# Supplementary material for: Quantitative proteomic analysis of Bi Zhong Xiao decoction against collagen-induced arthritis rats in the early and late stages
Source: PubMed Central journal article supplement (PMC9281147; doi:10.1186/s12906-022-03663-5), 2022-07-13
Supplement: 12906_2022_3663_MOESM1_ESM.pdf [file 12906_2022_3663_MOESM1_ESM.pdf]

## Supplementary Figures

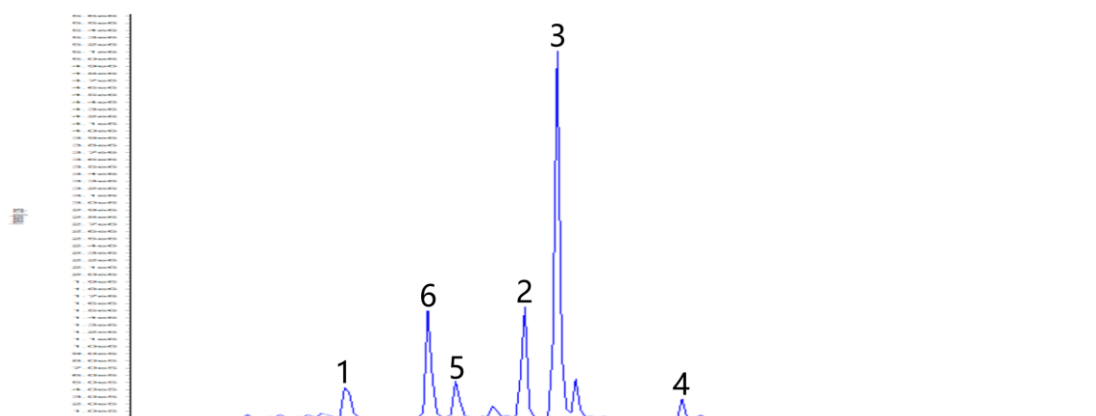

**Supplementary Figure S1** | UPLC-MS/MS analysis of BZXD components. UPLC-MS/MS TIC chromatograms of six major components (1: Paeoniflorin, 2: Rosmarinic acid, 3: Salvianolic acid B, 4: Glycyrrhizic acid, 5: Ferulic acid, 6: p-Coumaric acid) were detected in BZXD in the negative ESI mode.

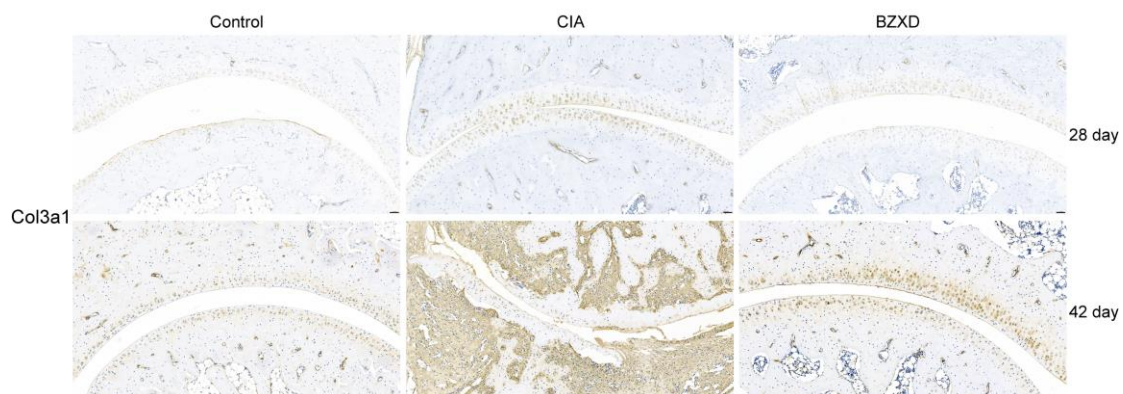

**Supplementary Figure S2** | Representative images of immunoreactivities (20X) in the ankle joint of rats; scale bar represents 50  $\mu$ m.

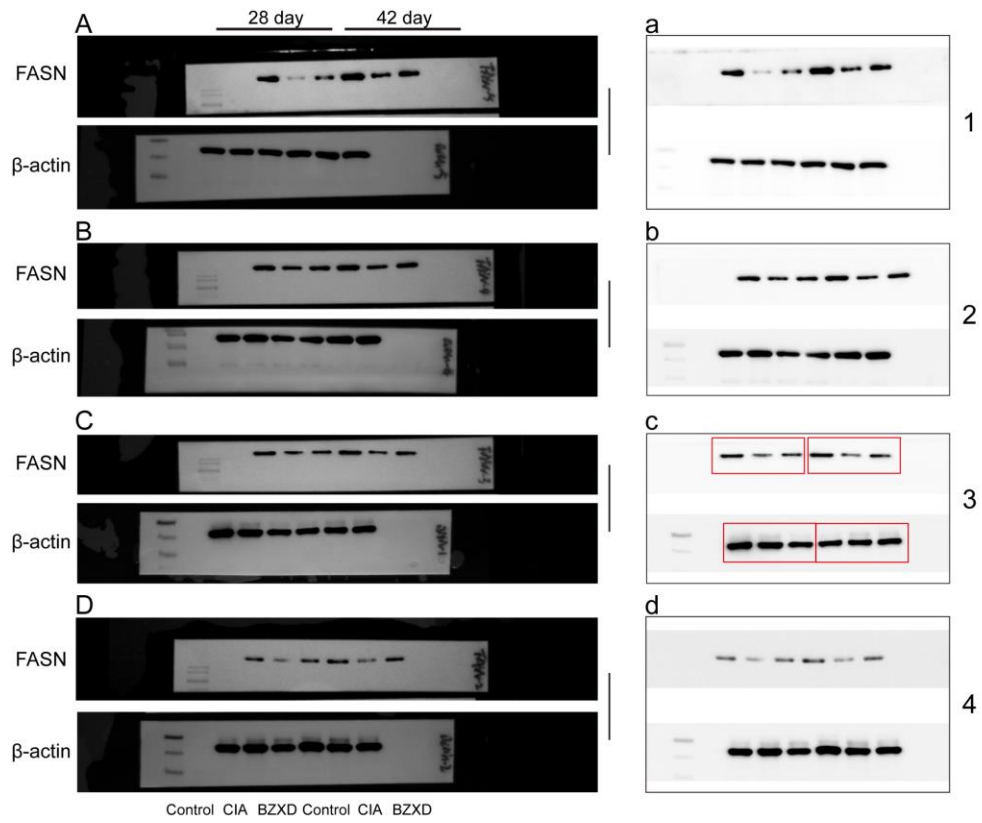

**Supplementary Figure S3 | (A-D)** Original image of all blots with visible edges in **Fig. 7**. The figures **a-d** were cutting blots. The red box represented the original blot area used in **Figure 7**.
